# Supplementary material
Source: PubMed Central journal article supplement (PMC9552811)
Supplement: mmc1.pdf [file mmc1.pdf]

**Supplemental Information**

**Corneal fibrosis abrogation by a localized**

**AAV-mediated *inhibitor of differentiation***

**3 (*Id3*) gene therapy in rabbit eyes *in vivo***

**Suneel Gupta, Michael K. Fink, Duraisamy Kempuraj, Nishant R. Sinha, Lynn M. Martin, Landon M. Keele, Prashant R. Sinha, Elizabeth A. Giuliano, Nathan P. Hesemann, Sudhanshu P. Raikwar, Shyam S. Chaurasia, and Rajiv R. Mohan**

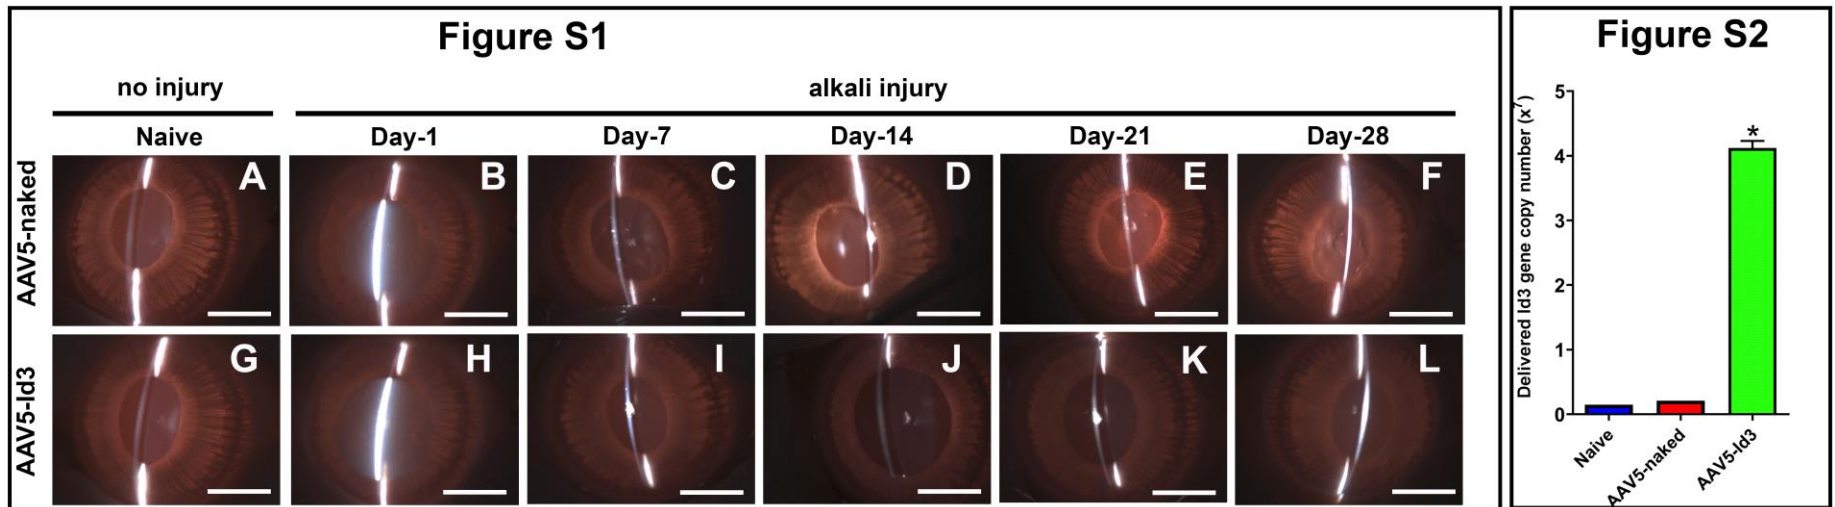

**Figure S1. AAV5-Id3 gene therapy regulates corneal fibrosis and maintains corneal transparency.** (A-F) The slit lamp microscopic images show the progress of alkali trauma in the AAV5-naked vector group in a time-dependent manner. (G-L) The slit-lamp microscopic images show the progress and efficacy of AAV5-Id3 gene therapy after alkali trauma in the AAV5-Id3 group in a time-dependent manner. The slit beam pattern in AAV5-Id3 group images shows that Inflammation and corneal scarring were reduced notably from day 7 onwards and much appreciable on day 28 to naïve corneal tissue. Scale bar = 3.0 mm.

**Figure S2. AAV5-Id3 gene copies are retained in corneal tissue.** The qRT-PCR analysis showed that efficient delivery of Id3 gene copies carried through AAV5 vectors was retained in corneal tissue via topical customized method after day -28. There were six samples in each group and error bars represent  $\pm$  SEM. \* $p < 0.001$ , and tissues were collected on day 28.

**Table S1. The sequence of primers used in the study**

| <b>Gene Name</b>              | <b>Gene Abbreviation</b> | <b>Forward Primer (5' to 3')</b> | <b>Reverse Primer (5' to 3')</b> |
|-------------------------------|--------------------------|----------------------------------|----------------------------------|
| $\beta$ -actin                | $\beta$ -actin           | CGGCTACAGCTTCACCACCA             | CAGGCAGCTCGTAGCTCTTC             |
| $\alpha$ -Smooth muscle actin | $\alpha$ -SMA            | TGGGTGACGAAGCACAGAGC             | CTTCAGGGGCAACACGAAGC             |
| Fibronectin                   | FN                       | CGCAGCTTCGAGATCAGTGC             | TCGACGGGATCACACTTCCA             |
| Collagen I                    | Col-I                    | TGTGGCCCAGAAGAACTGGTACAT         | ACTGGAATCCATCGGTCATGCTCT         |
| Collagen III                  | Col-III                  | TATCGAACACGCAAGGCTGTGAGA         | GGCCAACGTCCACACCAAATTCTT         |
| Transcription Factor-3        | E2A                      | GCAGGGTCCTCATGAGAGTG             | GGTAGGGCAGCAGTTTGT               |
| Transcription Factor-4        | E2-2                     | CCATCCAGGAACTATGGAGATG           | GAAGAAGGAGCTAGGGAAAGTG           |
| Transcription factor-12       | HEB                      | GACCATACCAGCAGTAGTTTCC           | GCCTTTCCTTCTCCCTTTCTATC          |
| Id3-mCherry                   | Id3-MCH                  | CGCGTCATCGACTACATTCTC            | CCCATGGTCTTCTTCTGCATT            |

The sequence of the forward and reverse primers was used in the study to confirm the mRNA expression of different proteins using PCR amplification.
